# Supplementary material
Source: PubMed Central journal article supplement (PMC5698132)
Supplement: NIHMS911476-supplement-1.pdf [file NIHMS911476-supplement-1.pdf]

**A**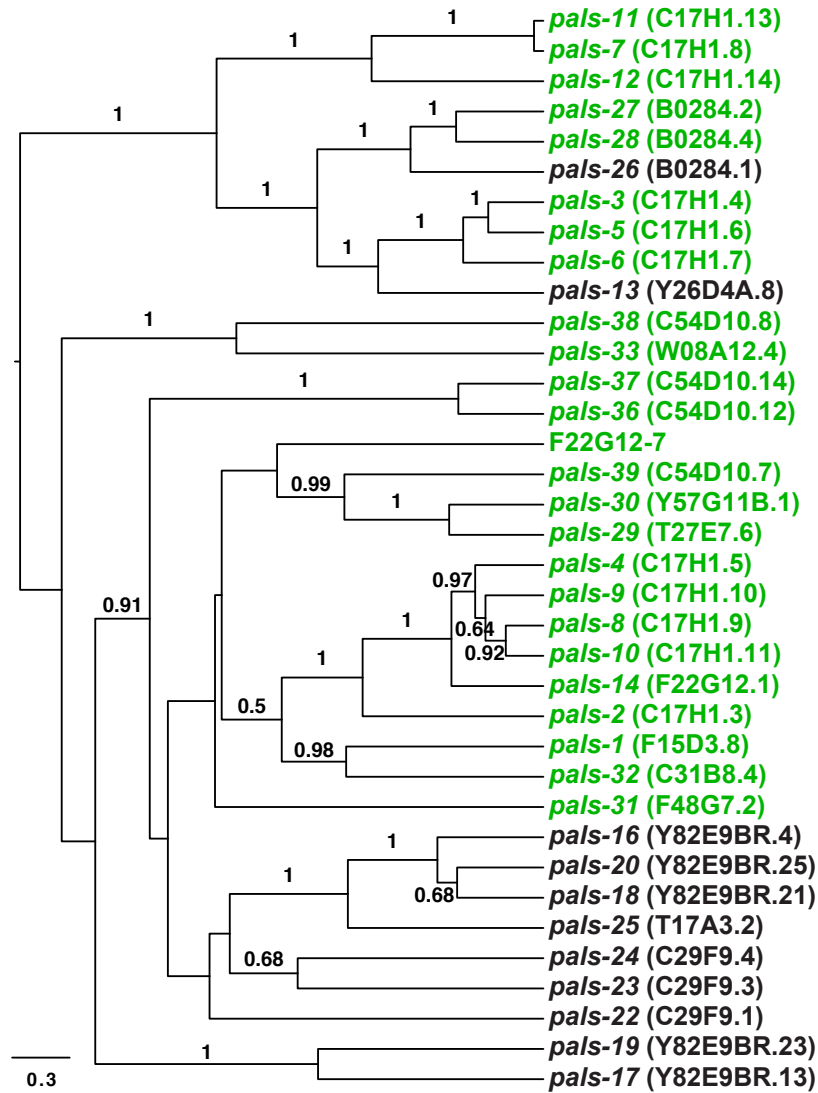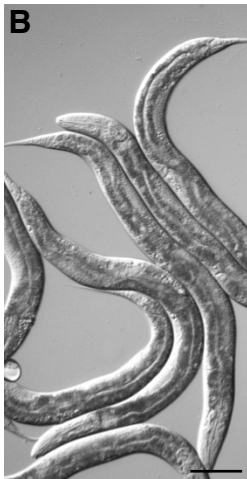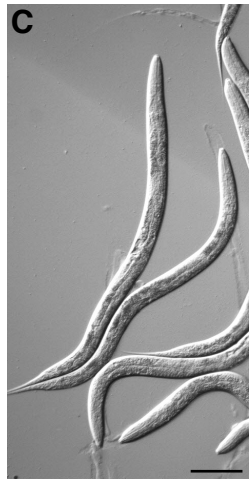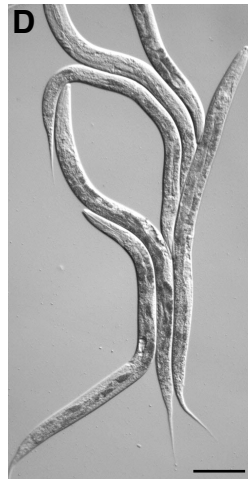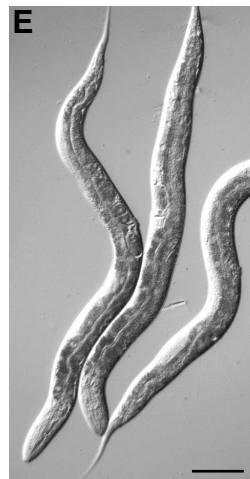

**Figure S1. Phylogeny of *pals* genes, and *pals-22* mutant developmental phenotypes. Related to Figure 1.**

(A) Phylogenetic relationships of *pals* genes were inferred from the amino acid alignment using Bayesian MCMC. Internal branch labels indicate the posterior probability, labels with less than 0.5 support are not shown. Genes that are upregulated upon infection are highlighted in green.

[S1-S3] (B-E) Smaller size of *pals-22* mutants shown with images of (B) wild type, (C) *pals-22(jy1)*, (D) *pals-22(jy3)*, and (E) *pals-22(jy3); jyEx193[pals-22(+)]* animals at 48 hours after the L1 larval stage. Scale bar, 100  $\mu\text{m}$ .

**A**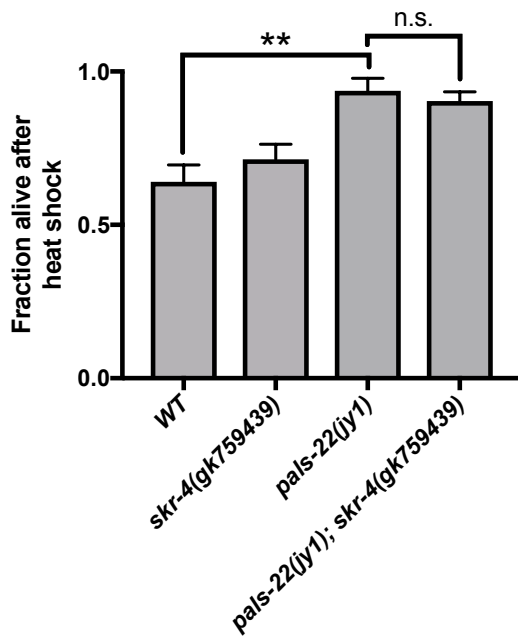**B**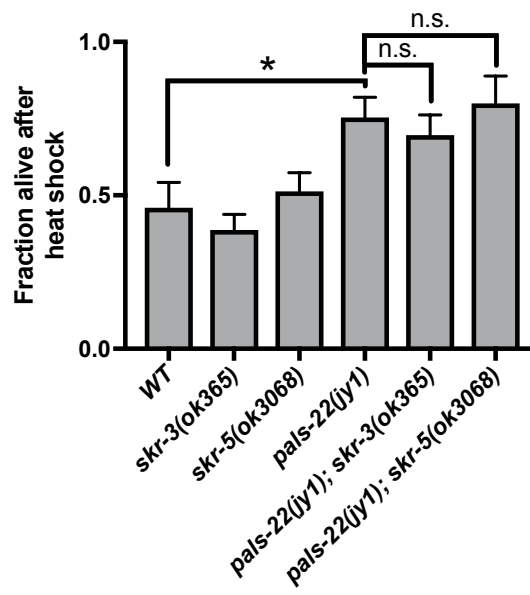**C**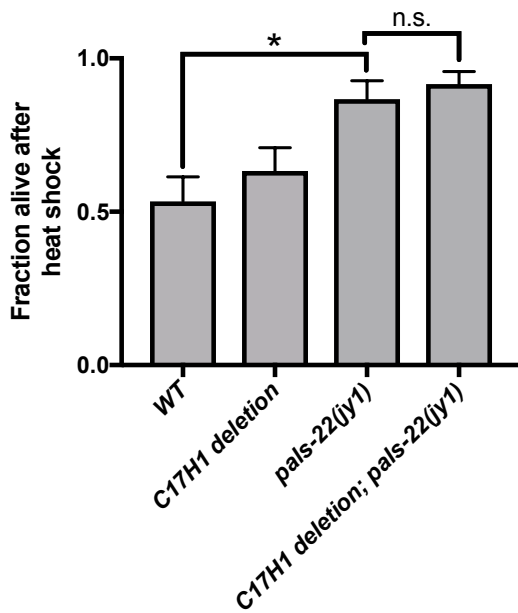**D**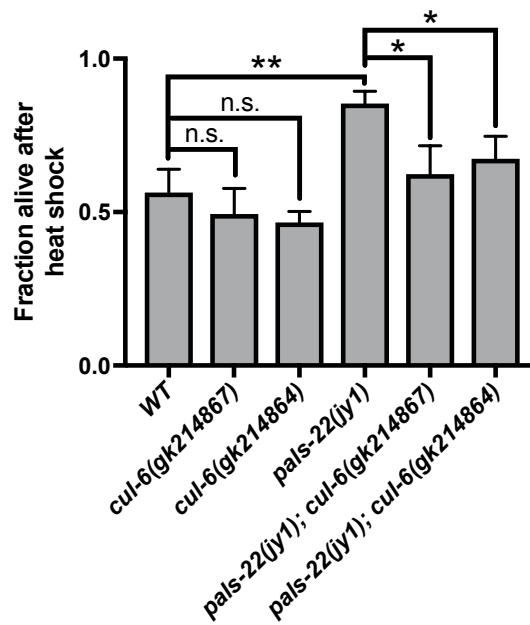

**Figure S2. Analysis of the effects of IPR gene mutations on thermotolerance of *pals-22* mutants. Related to Figure 2.**

(A-D) Survival of animals after 2h heat shock treatment at 37°C, followed by 24h at 20°C.

Strains were tested in triplicate. Mean fraction alive indicates the average survival among the triplicates, errors bars are SD. \*\*  $p < 0.01$ , \*  $p < 0.05$ , n.s., not significant with Student's t-test.

Assays were repeated three independent times with similar results, and data from a representative experiment are shown.

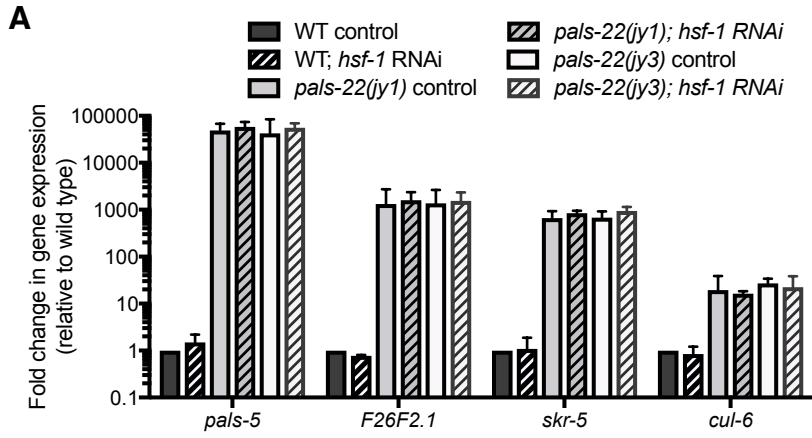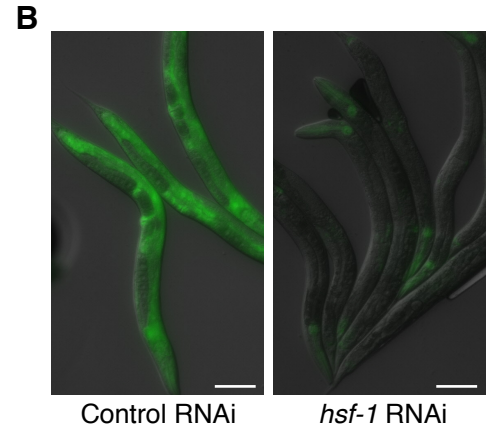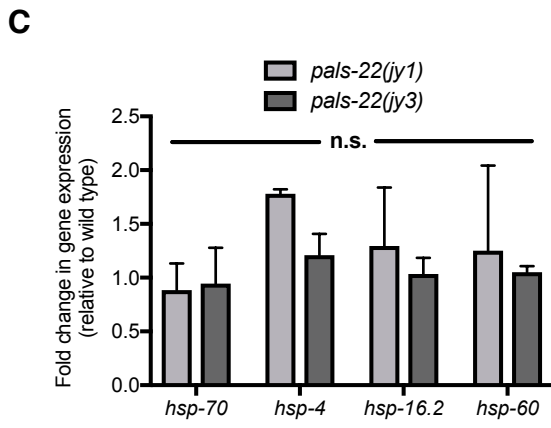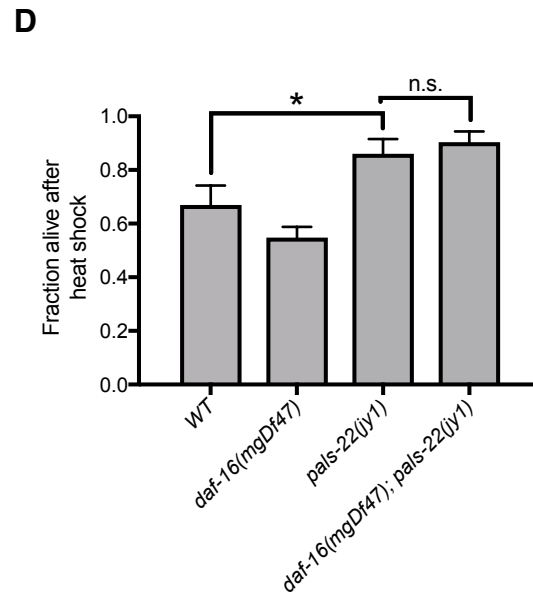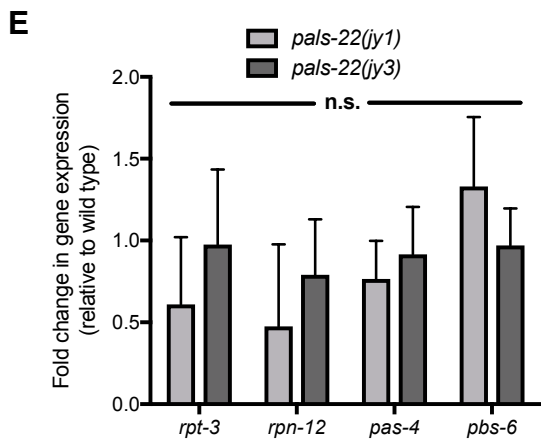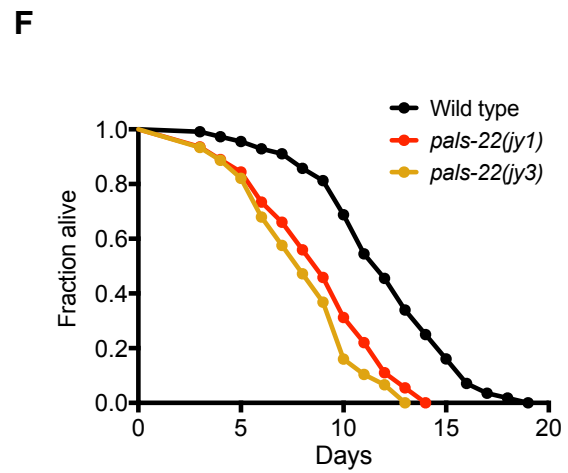

**Figure S3. Analysis of the interaction between *pals-22* and previously characterized stress resistance pathways. Related to Figure 2.**

(A) qRT-PCR measurement of IPR gene expression in wild type, *pals-22(jy1)*, and *pals-22(jy3)* animals treated with either control RNAi (L4440) or *hsf-1* RNAi, shown as the fold change relative to wild-type control. Results shown are the average of two independent biological replicates, error bars are SD. (B) Control for *hsf-1* RNAi efficacy. Robust induction of *hsp-16.2p::GFP* after heat shock (left, L4440 RNAi control) is strongly reduced by *hsf-1* RNAi treatment (right). Images are overlays of green and Nomarski channels and were taken with the same camera exposure. Scale bar, 100  $\mu$ m. (C) qRT-PCR measurement of *hsp* gene expression in wild type, *pals-22(jy1)*, and *pals-22(jy3)*. Results shown are the average of two independent biological replicates, error bars are SD. n.s., not significant with Student's t-test. (D) Survival of animals after 2h heat shock treatment at 37°C followed by 24h at 20°C. Strains were tested in triplicate. Mean fraction alive indicates the average survival among the triplicates, errors bars are SD. \*  $p < 0.05$ , n.s., not significant with Student's t-test. Heat shock assay was repeated three independent times with similar results, and data from a representative experiment are shown. (E) qRT-PCR measurement of proteasome subunit gene expression in *pals-22(jy1)* and *pals-22(jy3)* animals, shown as the fold change relative to wild-type control. Results shown are the average of two independent biological replicates, error bars are SD. n.s., not significant with Student's t-test. (F) Lifespan of wild type, *pals-22(jy1)*, and *pals-22(jy3)* animals. Assays were performed with at least 30 animals per plate, and three plates per strain per experiment. Experiment was repeated two independent times with similar results, with data from a representative experiment shown.  $p$ -value for *pals-22(jy1)* and *pals-22(jy3)* compared to wild type is  $<0.0001$  using the Log-rank test.

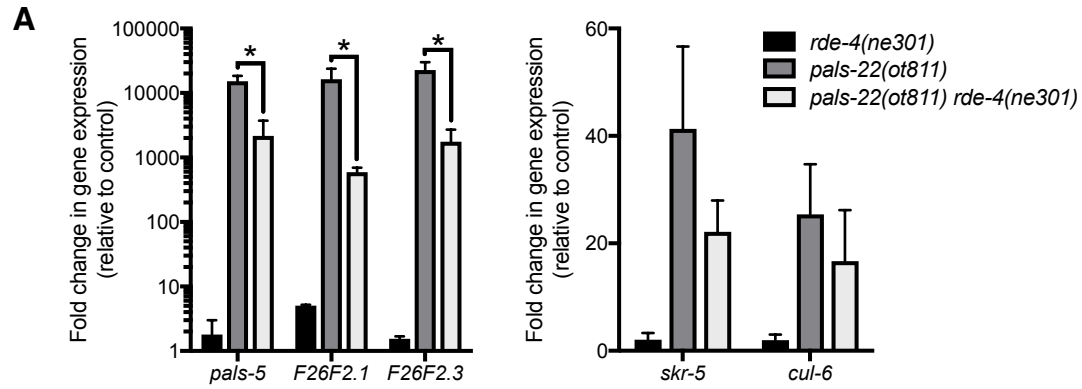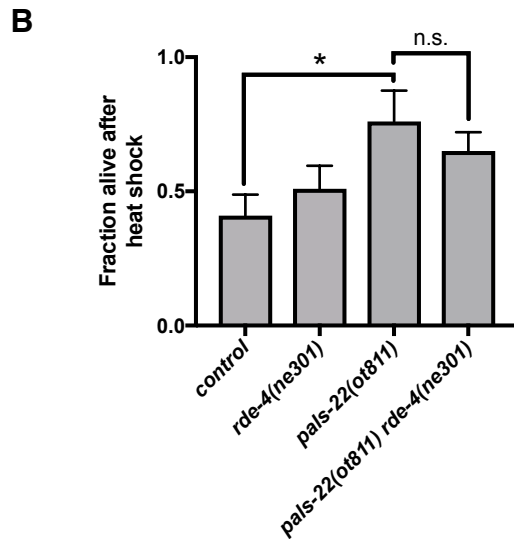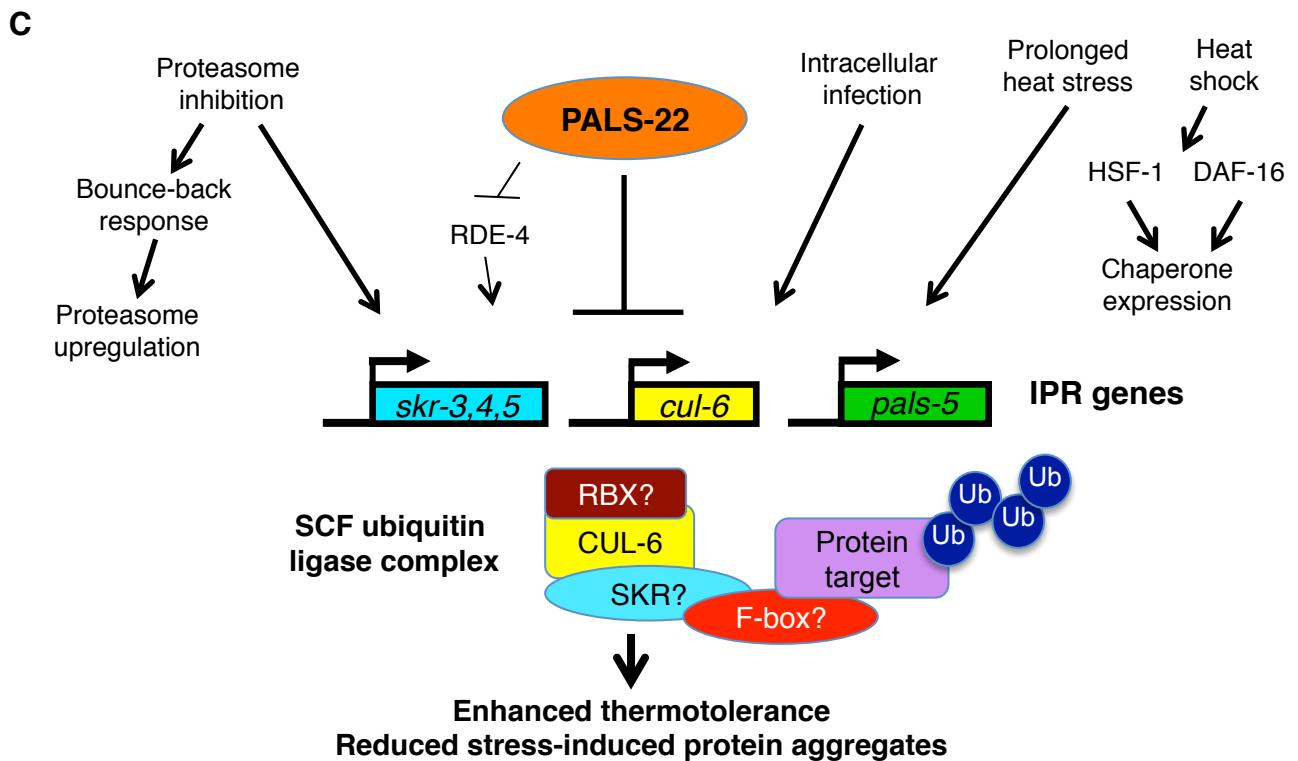

**Figure S4. Interaction of *pals-22* with *rde-4* and model for IPR pathway. Related to Figure 4.**

(A) qRT-PCR measurement of IPR gene expression, shown as the fold change relative to control. All strains contain the *otIs381* array. Results shown are the average of two independent biological replicates, error bars are SD. \*  $p < 0.05$  with Student's t-test. (B) Survival of animals after 2h heat shock treatment at 37°C followed by 24h at 20°C. All strains contain the *otIs381* array. Strains were tested in triplicate. Mean fraction alive indicates the average survival among the triplicates, errors bars are SD. Assay was repeated three independent times with similar results, and data from a representative experiment are shown. In all three replicates, *pals-22(ot811) rde-4(ne301)* animals had decreased average survival after heat shock as compared to *pals-22(ot811)* animals. \*  $p < 0.05$ , n.s., not significant with Student's t-test. (C) Model for IPR pathway providing increased proteostasis capacity, independent of other known stress response pathways.



|                                 |                             |
|---------------------------------|-----------------------------|
| <i>skr-3</i> qPCR forward       | CCGACAGCCAGAAACAAATCA       |
| <i>skr-3</i> qPCR reverse       | TCTGTGATGGTCTTGGATTGAC      |
| <i>skr-4</i> qPCR forward       | CCGACAGCCAGAAACAAATCA       |
| <i>skr-4</i> qPCR reverse       | GGTCTTGGATTGGCTGATCAC       |
| <i>skr-5</i> qPCR forward       | CGAAGAGCAAGATGTCAAATTG      |
| <i>skr-5</i> qPCR reverse       | AGAAGCTTGGATTGATTGGCA       |
| <i>cul-6</i> qPCR forward       | CTGGGCTTACTCACAAATGCC       |
| <i>cul-6</i> qPCR reverse       | GCAGAGTTGGCTTGCTGTAA        |
| <i>skr-1</i> qPCR forward       | GGCAAAGGAACGCGAAATCA        |
| <i>skr-1</i> qPCR reverse       | TTGAGAGACGGATCACATTGC       |
| <i>pals-5</i> qPCR forward      | CATTGGAAAGCGATATTGGA        |
| <i>pals-5</i> qPCR reverse      | TCTCCAGGCACCTATCTTGTAG      |
| <i>F26F2.1</i> qPCR forward     | TGGAACCAGGTCAGAGACAC        |
| <i>F26F2.1</i> qPCR reverse     | TTGTGAGAATTTCCGCGATA        |
| <i>F26F2.3</i> qPCR forward     | GGAAAGGGAATGCATTATGG        |
| <i>F26F2.3</i> qPCR reverse     | CCGCACGGTTATTTCTCAT         |
| <i>F26F2.4</i> qPCR forward     | CAACAATACACTGCGGATGG        |
| <i>F26F2.4</i> qPCR reverse     | TCGCACTGTTATTCATCTCCA       |
| <i>hsp-70</i> qPCR forward      | CTTGGTTGGGGGATCAACT         |
| <i>hsp-70</i> qPCR reverse      | TGCTTCGTCTGGATTAATGG        |
| <i>hsp-4</i> qPCR forward       | CATCTCGTGGAAATCAACCCT       |
| <i>hsp-4</i> qPCR reverse       | ACTTAGTCATGACTCCTCCG        |
| <i>hsp-16.2</i> qPCR forward    | TGCAGAATCTCTCCATCTGAGT      |
| <i>hsp-16.2</i> qPCR reverse    | TGGTTTAAACTGTGAGACGTTGA     |
| <i>hsp-60</i> qPCR forward      | CAAGGCTCCAGGATTCG           |
| <i>hsp-60</i> qPCR reverse      | AAAGATCGTTGCTCCCG           |
| <i>snb-1</i> qPCR forward       | CCGGATAAGACCATCTTGACG       |
| <i>snb-1</i> qPCR reverse       | GACGACTTCATCAACCTGAGC       |
| <i>rpt-3</i> qPCR forward       | CCCAAGAGGAGTTCTCATGTA       |
| <i>rpt-3</i> qPCR reverse       | ATGAAGGAAGCAGCAGTATT        |
| <i>rpn-12</i> qPCR forward      | CTGCCAACAGATTGTCC           |
| <i>rpn-12</i> qPCR reverse      | GGCGTAGAGATGTAAGCG          |
| <i>pas-4</i> qPCR forward       | CGAGCCATCTGGAGCTTACTA       |
| <i>pas-4</i> qPCR reverse       | TCCTCAAGGTATTCACGCAC        |
| <i>pbs-6</i> qPCR forward       | TGGACAGAGCCATCTCATT         |
| <i>pbs-6</i> qPCR reverse       | CTTCAGCGATGACCAAGTG         |
| <i>pals-22</i> promoter forward | AGTAGTGCTGAAAAATTTAAATG     |
| <i>pals-22</i> promoter reverse | GGATTTCTGTAACATGGG          |
| <i>vha-6</i> promoter forward   | TTCCACCATTGTGGTGAGAC        |
| <i>vha-6</i> promoter reverse   | TAGTCGCCCTGAAATTAAC         |
| <i>unc-119</i> promoter forward | TGTGCCAAGCTTCAGTAAAAGAAGTAG |
| <i>unc-119</i> promoter reverse | ATATGCTGTTGTAGCTGAAAATTTTG  |
| <i>dpy-7</i> promoter forward   | AATCTCATTCCACGATTTCTCGCAA   |
| <i>dpy-7</i> promoter reverse   | CATTTATCTGGAACAAAATGTAAG    |

|                                                  |                                                                                                            |
|--------------------------------------------------|------------------------------------------------------------------------------------------------------------|
| <i>C17H1.3</i> sgRNA sequence                    | GAACAGAGTGAAGCAGGAAG                                                                                       |
| <i>C17H1.7</i> sgRNA sequence                    | ACGGGCAGATATACAGAGAC                                                                                       |
| <i>C17H1</i> CRISPR ssDNA repair template        | ATTTTGCTCTTATCACATTTATAGAAATGACAAAAGTCACCGA<br>GCCCTCGGTTTTTCTTTGCGATAGTTCAGAGCTTCTCAAATCT<br>CTCA         |
| <i>dpy-10(cn64)</i> CRISPR ssDNA repair template | CACTTGAACTTCAATACGGCAAGATGAGAATGA<br>CTGGAACCGTACCGCATGCGGTGCCTATGGTAG<br>CGGAGCTTCACATGGCTTCAGACCAACAGCCT |
| <i>dpy-10(cn64)</i> sgRNA sequence               | GCTACCATAGGCACCACGAG                                                                                       |
| GW503 <i>C17H1</i> deletion genotyping           | GTTAGAAATGCGCTGTGACGT                                                                                      |
| GW504 <i>C17H1</i> deletion genotyping           | AGCTCGCTCAGCATTGTTG                                                                                        |
| GW515 <i>C17H1</i> deletion genotyping           | GGAATGGTACTACCAGTGCTG                                                                                      |

**Table S1. Primers used in this study. Related to STAR methods.**

## Supplemental References

- S1. Bakowski, M.A., Desjardins, C.A., Smelkinson, M.G., Dunbar, T.L., Lopez-Moyado, I.F., Rifkin, S.A., Cuomo, C.A., and Troemel, E.R. (2014). Ubiquitin-mediated response to microsporidia and virus infection in *C. elegans*. *PLoS Pathog* *10*, e1004200.
- S2. Chen, K., Franz, C.J., Jiang, H., Jiang, Y., and Wang, D. (2017). An evolutionarily conserved transcriptional response to viral infection in *Caenorhabditis* nematodes. *BMC genomics* *18*, 303.
- S3. Sarkies, P., Ashe, A., Le Pen, J., McKie, M.A., and Miska, E.A. (2013). Competition between virus-derived and endogenous small RNAs regulates gene expression in *Caenorhabditis elegans*. *Genome research* *23*, 1258-1270.
